# Supplementary material for: Transferrin-Conjugated Polymeric Nanoparticle for Receptor-Mediated Delivery of Doxorubicin in Doxorubicin-Resistant Breast Cancer Cells
Source: PubMed Central journal article supplement (PMC6410246; doi:10.3390/pharmaceutics11020063), 2019-02-01
Supplement: pharmaceutics-11-00063-s001.pdf [file pharmaceutics-11-00063-s001.pdf]

# Supplementary Information:

## Transferrin-Conjugated Polymeric Nanoparticle for Receptor-Mediated Delivery of Doxorubicin in Doxorubicin-Resistant Breast Cancer Cells

Zar Chi Soe, Jun Bum Kwon, Raj Kumar Thapa, Wenquan Ou, Hanh Thuy Nguyen, Milan Gautam, Kyung Taek Oh, Han-Gon Choi, Sae Kwang Ku, Chul Soon Yong and Jong Oh Kim

### Synthesis of carboxylated poloxamer F127

Carboxylated F127 was characterized by FTIR and proton nuclear magnetic resonance  $^1\text{H}$  NMR analysis (Figure S2). According to its FTIR spectrum, the specific peaks such as C–O–C, O–H, C=O and methyl groups that are corresponding peaks of succinic anhydride and F127 occurred at (1159, 1630, 1735, and 2885)  $\text{cm}^{-1}$ . Moreover, carboxylated F127 was confirmed by peaks obtained from  $^1\text{H}$ -NMR analysis.

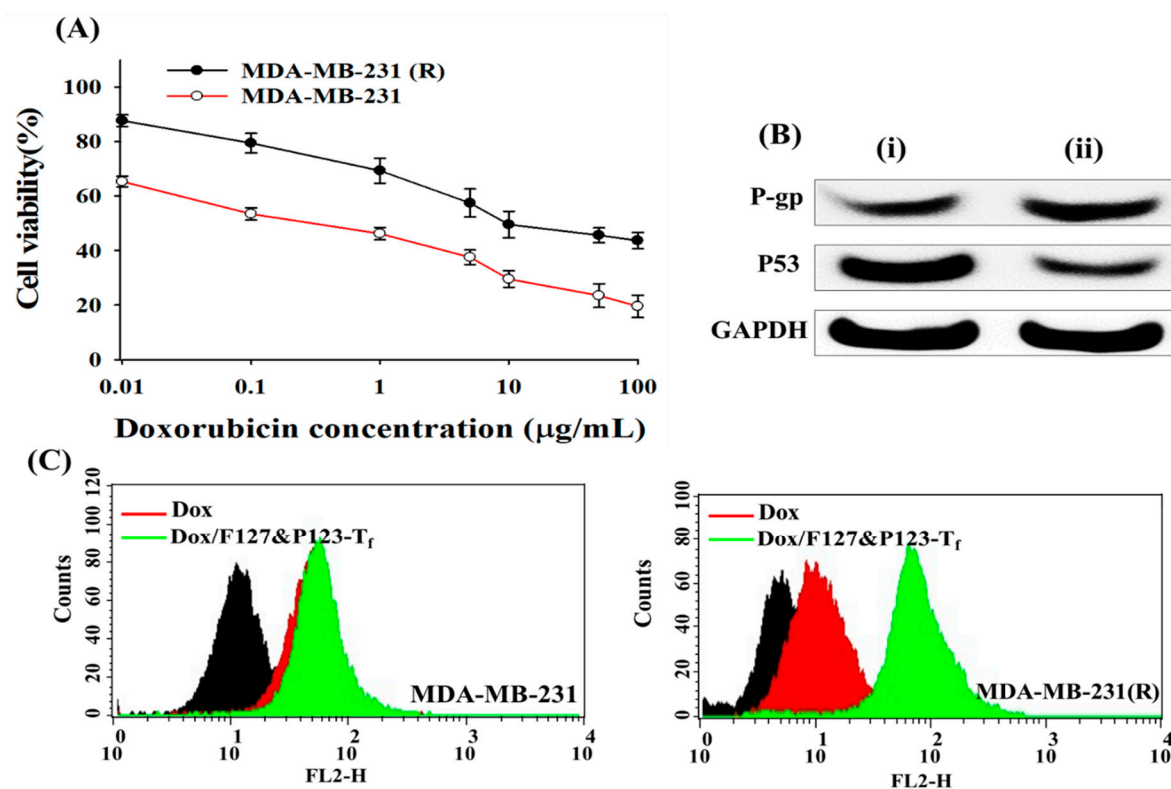

**Figure S1.** Characterization of implemented Dox-resistant MDA-MB-231(R) cells. (A) Cell viability of MDA-MB-231 and MDA-MB-231(R), (B) different proteins level (P-gp and P53) of MDA-MB-231 and MDA-MB-231(R), and (C) cellular uptake of Dox and Dox/F127&P123-T<sub>f</sub> in MDA-MB-231 and MDA-MB-231(R).

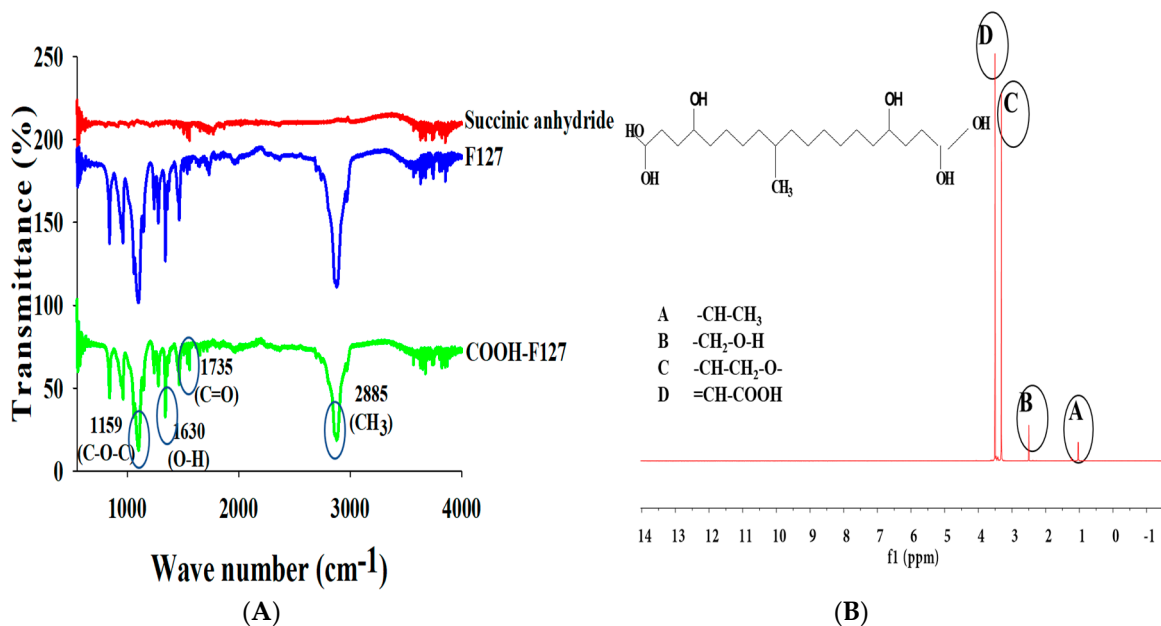

Figure S2. (A) FTIR spectrum and (B)  $^1\text{H}$  NMR analysis of carboxylated poloxamer F127.

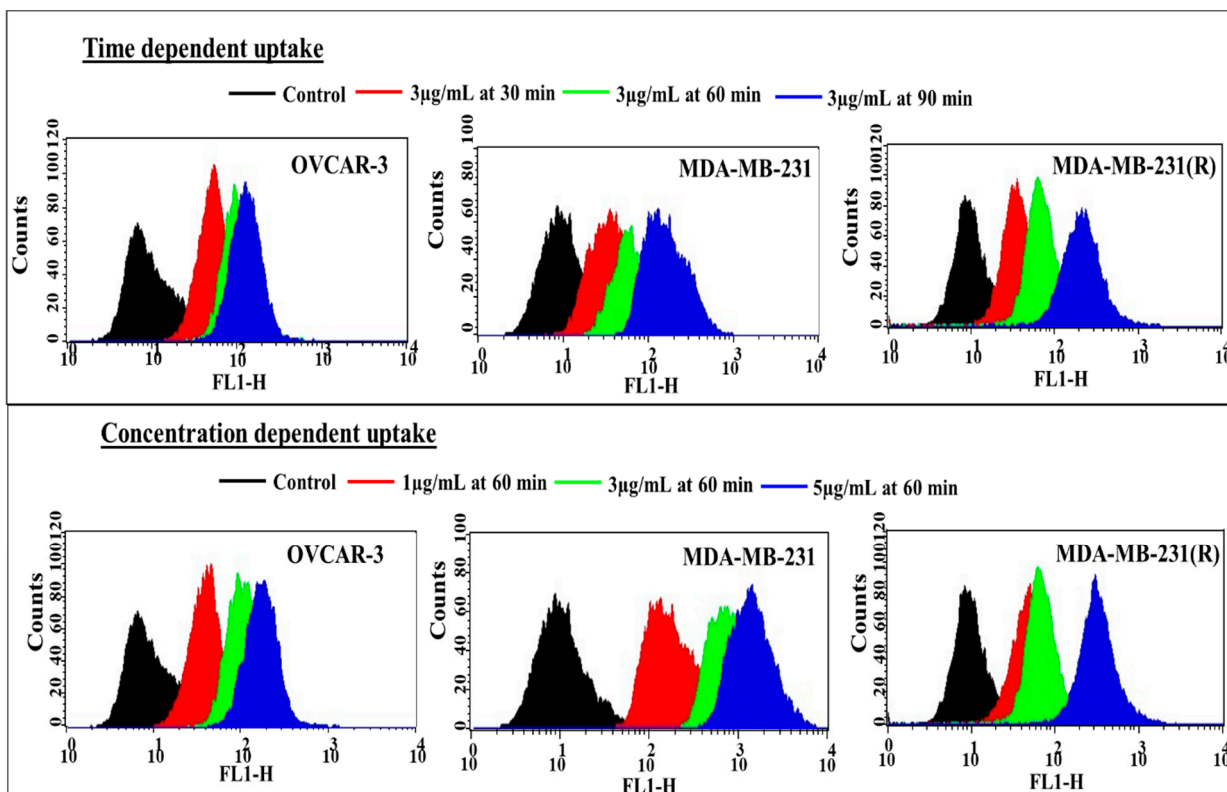

Figure S3. Comparison of time-dependent and concentration-dependent cellular uptake efficiency of Dox/F127&P123 in OVCAR-3, MDA-MB-231, and MDA-MB-231(R).

**Standard curve for IC50 value of Dox**

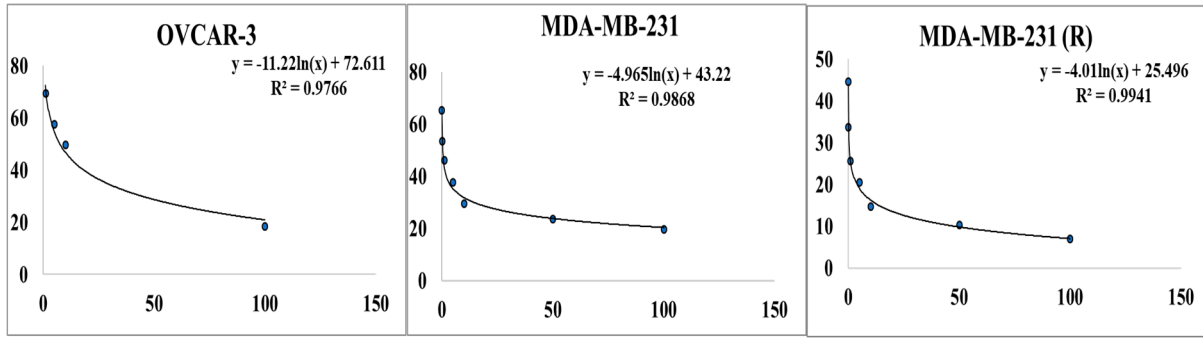

**Standard curve for IC50 value of Dox/F127&P123**

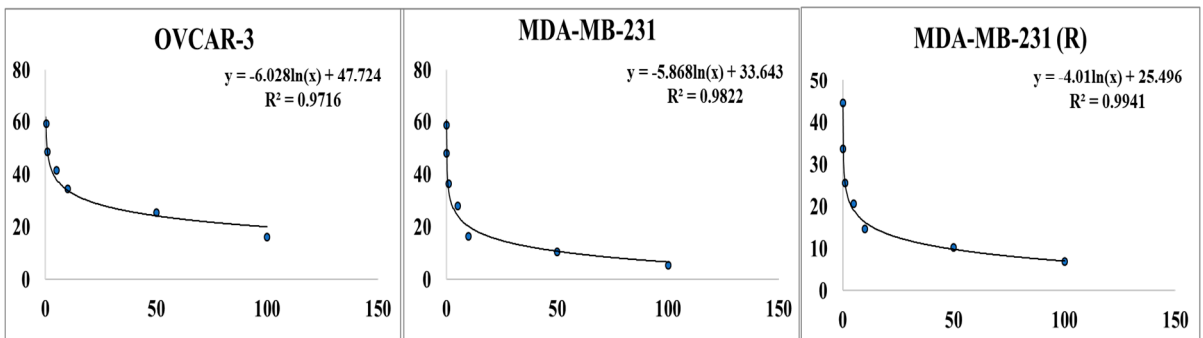

**Figure S4.** Standard curve for calculation of IC 50 value of Dox and Dox/F127&P123-Tr.

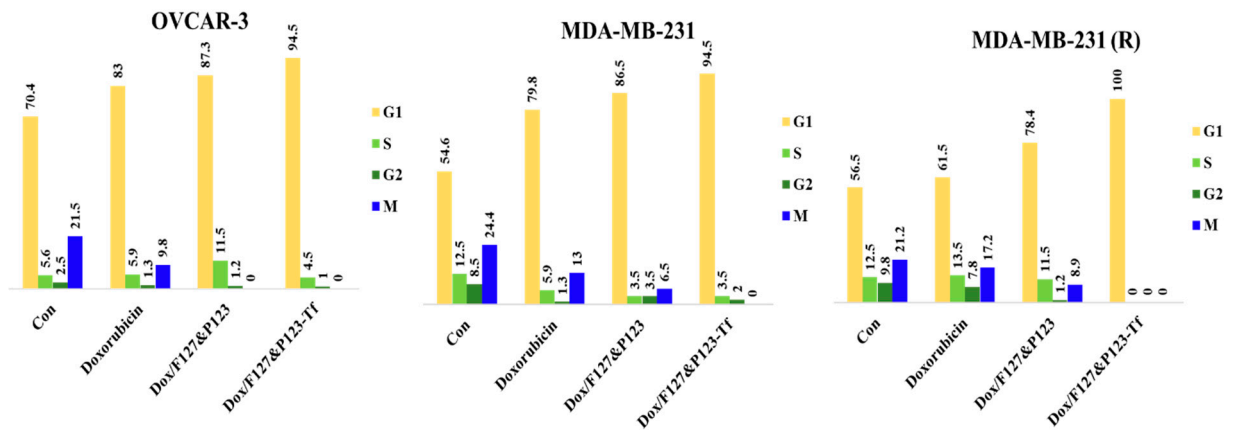

**Figure S5.** Quantitative evaluation of comparison of cell cycle distribution of Dox, Dox/F127&P123 and Dox, Dox/F127&P123-Tr in OVCAR-3, MDA-MB231, and MDA-MB231(R).

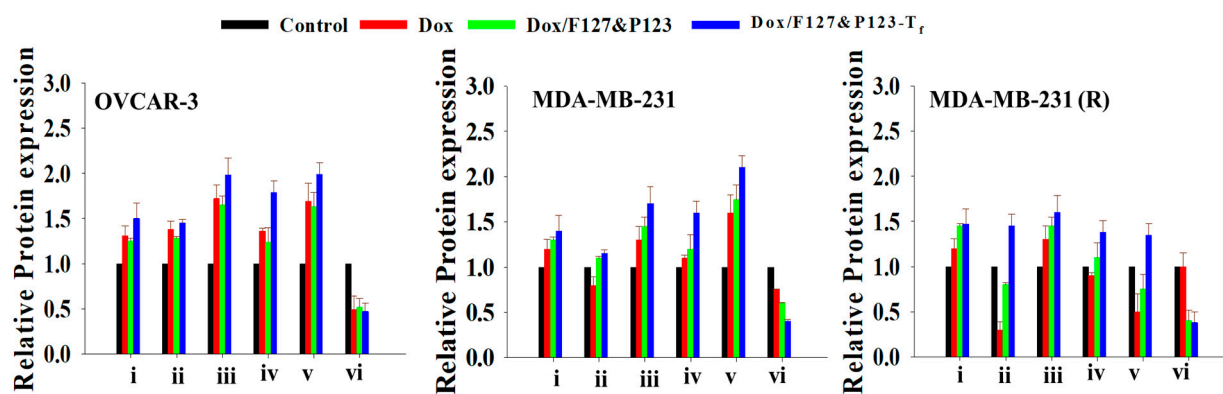

**Figure S6.** Quantitative evaluation of protein expression of (i) Cleaved-caspase 8, (ii) Cleaved-caspase 3, (iii) P27, (iv) P53, (v) BAX, and (vi) Bcl2 of P53 in OVCAR-3, MDA-MB231, and MDA-MB231 following treatment with Dox, Dox/F127&P123 and Dox, Dox/F127&P123-Ti.

**Table S1.** IC<sub>50</sub> values of Dox and Dox/F127&P123 in three cell lines.

| Cell lines    | Dox ( $\mu\text{g/mL}$ ) | Dox/F127&P123 ( $\mu\text{g/mL}$ ) |
|---------------|--------------------------|------------------------------------|
| OVCAR-3       | $8.5 \pm 0.98$           | $0.9 \pm 0.05$                     |
| MDA-MB-231    | $7.9 \pm 1.24$           | $1.6 \pm 0.98$                     |
| MDA-MB-231(R) | $80.4 \pm 1.85$          | $0.1 \pm 0.04$                     |
